# Supplementary material for: A fiber-shaped sensor constructed by coaxial wet-spinning for dual-mode sensing
Source: Royal Society of Chemistry journal article supplement (doi:10.1039/d4ta08176e), 2025-01-01
Supplement: d4ta08176e1.pdf [file d4ta08176e1.pdf]

Supporting Information for

## **Fiber-shaped sensor constructed by coaxial wet-spinning for dual-mode sensing**

*Duixin Ma<sup>1</sup>, Huayang Fang<sup>1</sup>, Jianping Sun<sup>1\*</sup>, Tao Jiang<sup>2\*</sup>*

<sup>a</sup>State Key Laboratory of Featured Metal Materials and Life-cycle Safety for Composite Structures, School of Resources, Environment and Materials, Guangxi University, Nanning 530004, China

<sup>b</sup>School of Journalism and Cultural Communication, Guangxi University of Finance and Economics, Nanning, Guangxi 530004, China

E-mail: [jpsun@gxu.edu.cn](mailto:jpsun@gxu.edu.cn), [443133847@qq.com](mailto:443133847@qq.com).

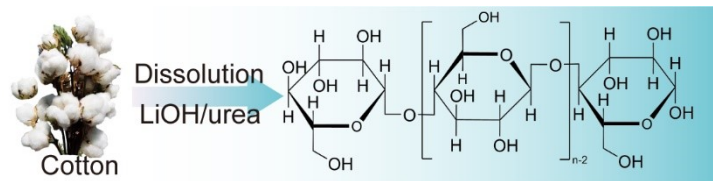

**Figure S1.** Schematic diagram of cellulose dissolution by alkali urea system.

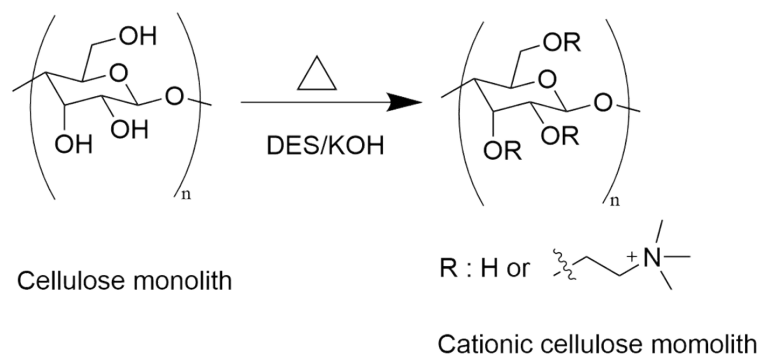

**Figure S2.** Schematic diagram of the functionalization of cellulose monolith by CCC/urea deep eutectic solvent.

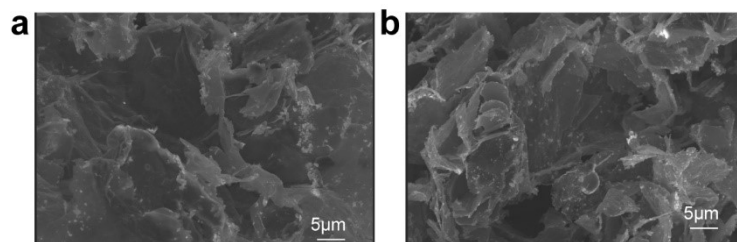

**Figure S3.** Morphology of cellulose powder (a) before and (b) after DES modification.

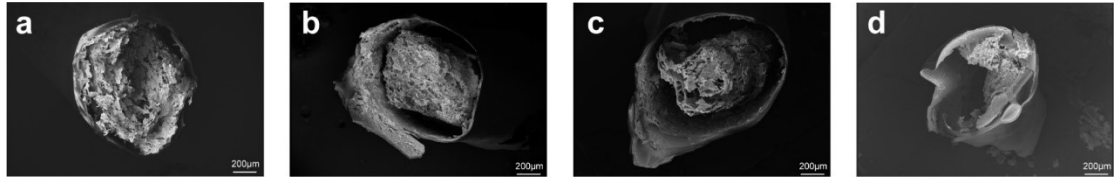

**Figure S4.** SEM of MCC fibers. (a-d) Cross-sectional morphology of MCC-(1, 3, 9, 12).

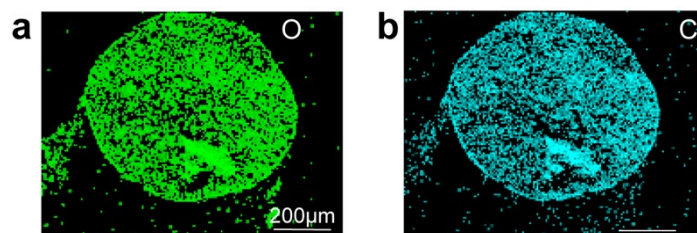

**Figure S5.** EDS mapping of the skin-core MCC-6 aerogel fibers.

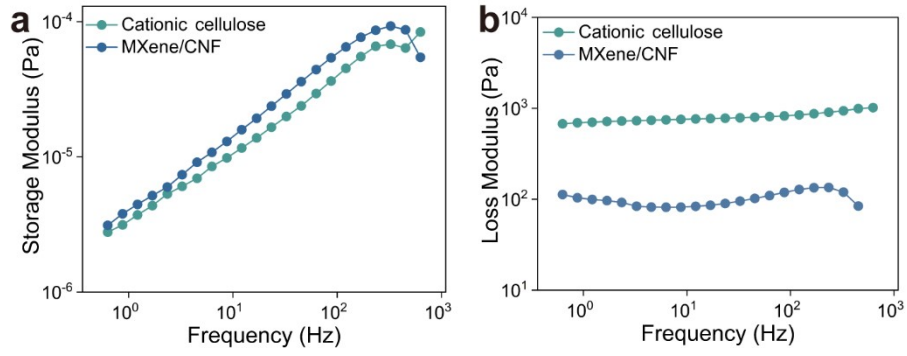

**Figure S6.** Viscosity of spinning solution with Cellulose and MXene/CNF. a-b) The curve of storage modulus ( $G'$ ) and loss modulus ( $G''$ ) of Cellulose and MXene/CNF with frequency.

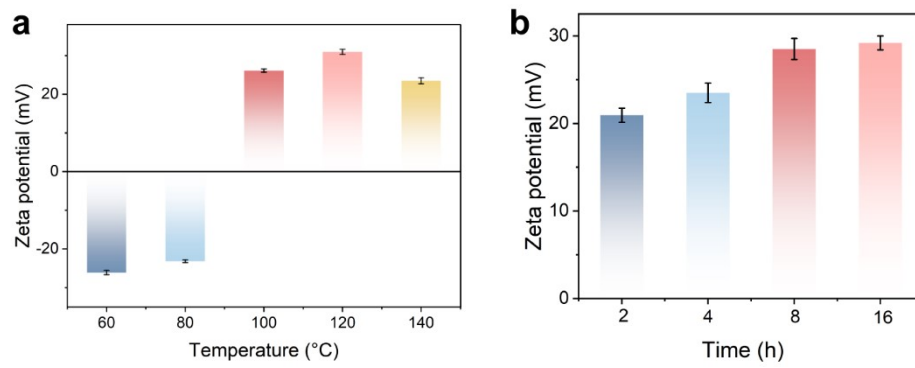

**Figure S7.** a-b) Zeta potential of cellulose at different treatment temperatures and times, respectively.



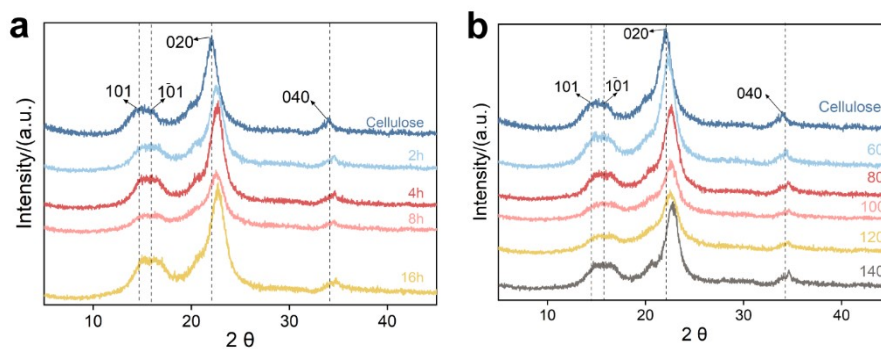

**Figure S8.** XRD analysis of cellulose and cationized MCC-6 before and after DES modification. a) Effect of different DES modification times on cellulose crystallinity. b) Effect of different DES modification temperatures on cellulose crystallinity.

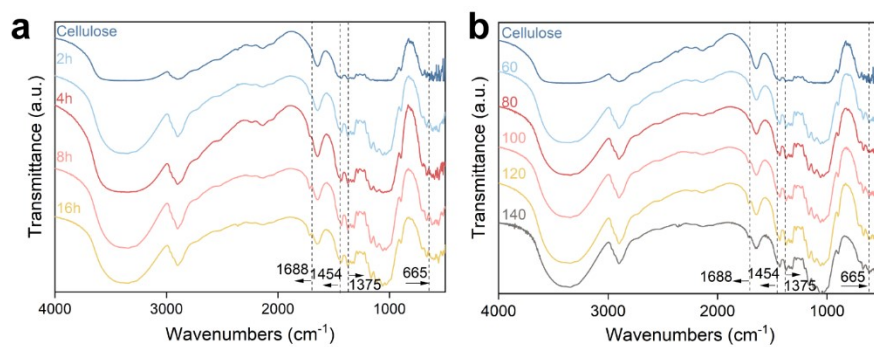

**Figure S9.** FTIR analysis of cellulose and cationized MCC-6 before and after DES modification. a) Effect of different DES modification times on cellulose crystallinity. b) Effect of different DES modification temperatures on cellulose crystallinity.

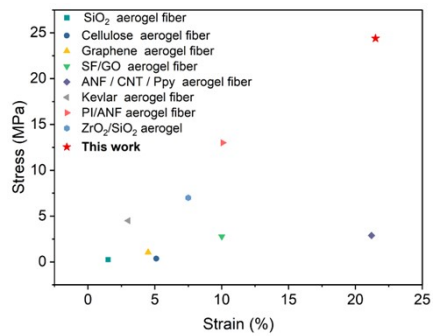

**Figure S10.** Comparison of mechanical properties of MCC-6 with other literature<sup>1-8</sup>.

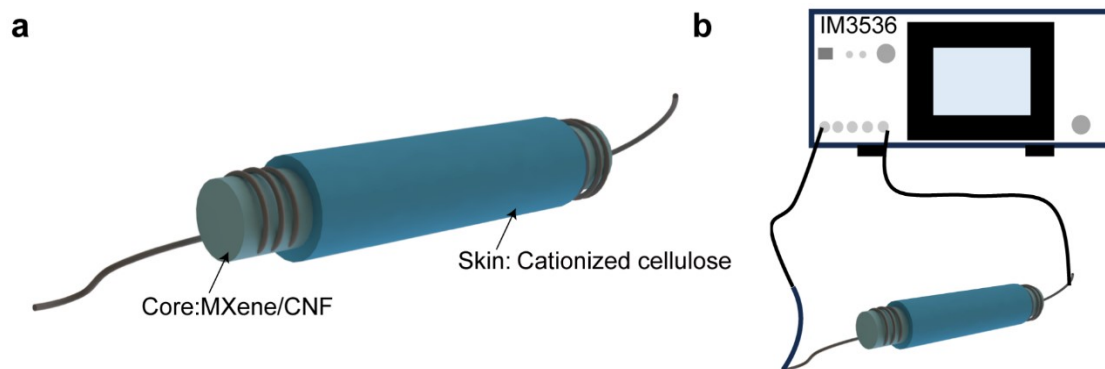

**Figure S11.** Schematic diagram of (a) the wiring for the fiber sensor in pressure sensing and (b) performance test setup for pressure sensing.

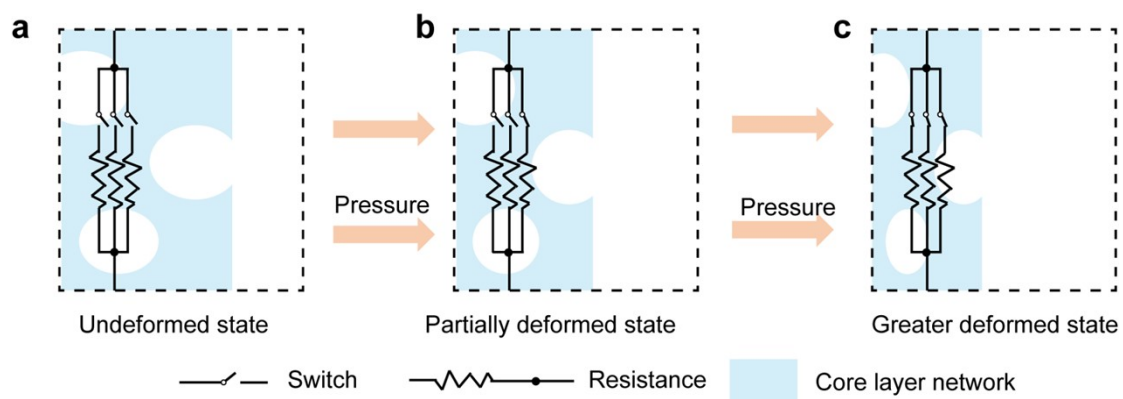

**Figure S12.** Equivalent circuit diagrams reflecting changes in resistance with deformation: (a) no deformation; (b) partial deformation; (c) greater deformation.

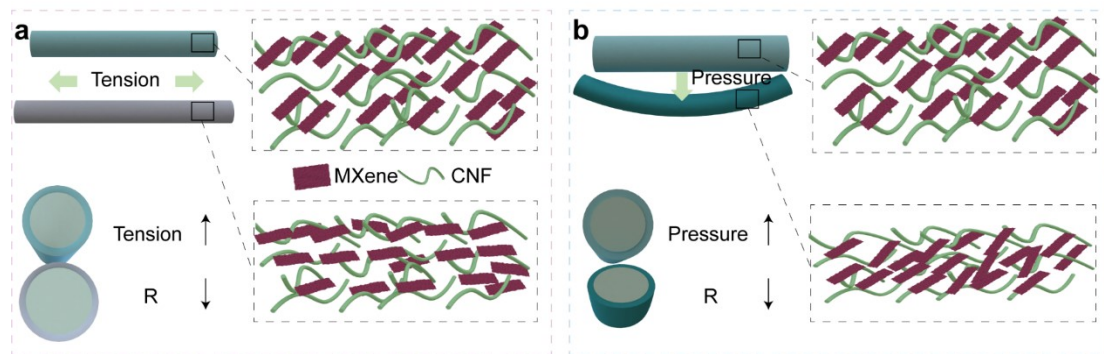

**Figure S13.** Schematics of the sensing principle of the MCC-6 sensor under (a) stretching and (b) compressive deformation.

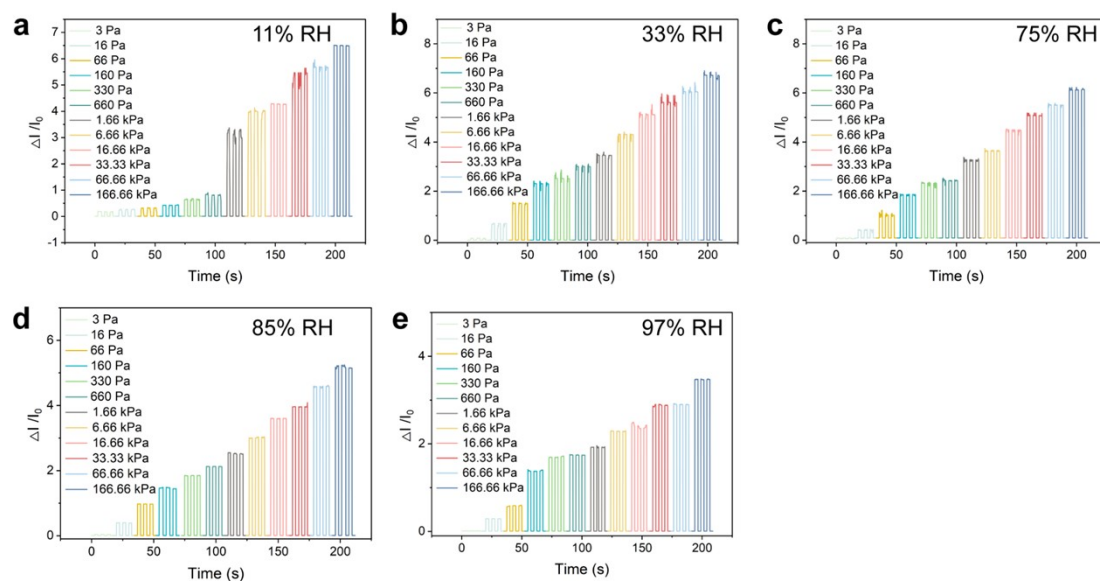

**Figure S14.** Current-time ( $I$ - $T$ ) plots of the MCC-6 fiber under various pressures at a constant humidity level. a-e)  $I$ - $T$  plots of the MCC-6 fiber under various pressures at (a) 11% RH, (b) 33% RH, (c) 75% RH, (d) 85% RH, and (e) 97% RH.

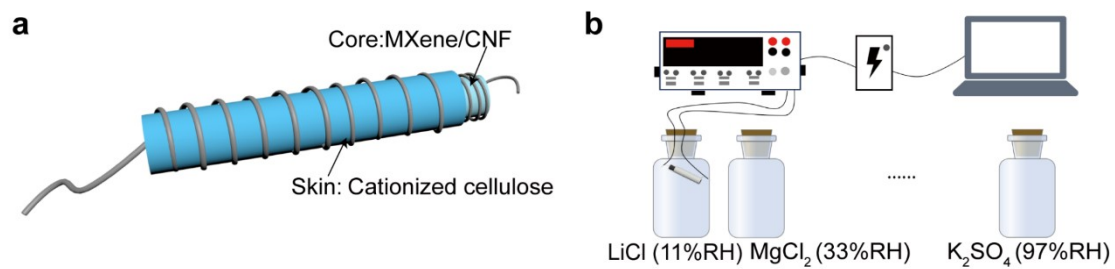

**Figure S15.** Schematic diagram of (a) the wiring for the fiber sensor in humidity sensing and (b) performance test setup for humidity sensing.



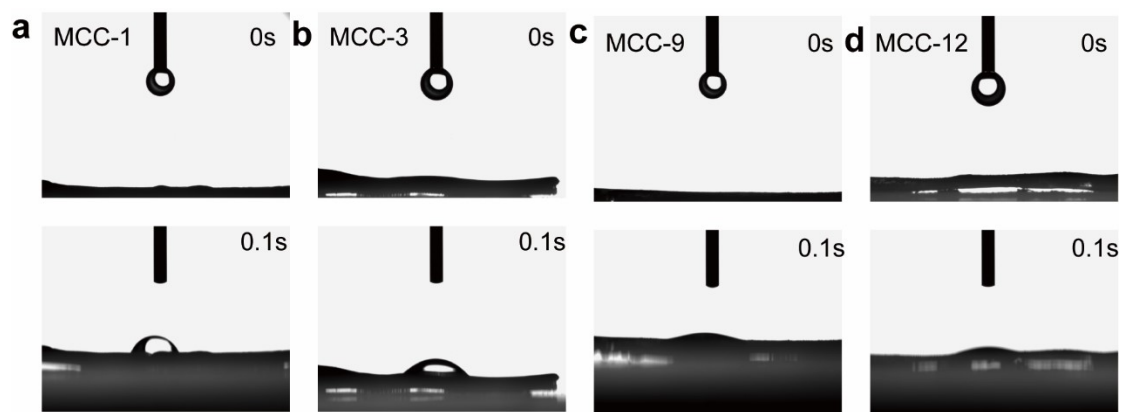

**Figure S16.** The water contact angle of the MCC humidity sensor. a-d) Water contact angle of the MCC-(1, 3, 9, 12) humidity sensor.

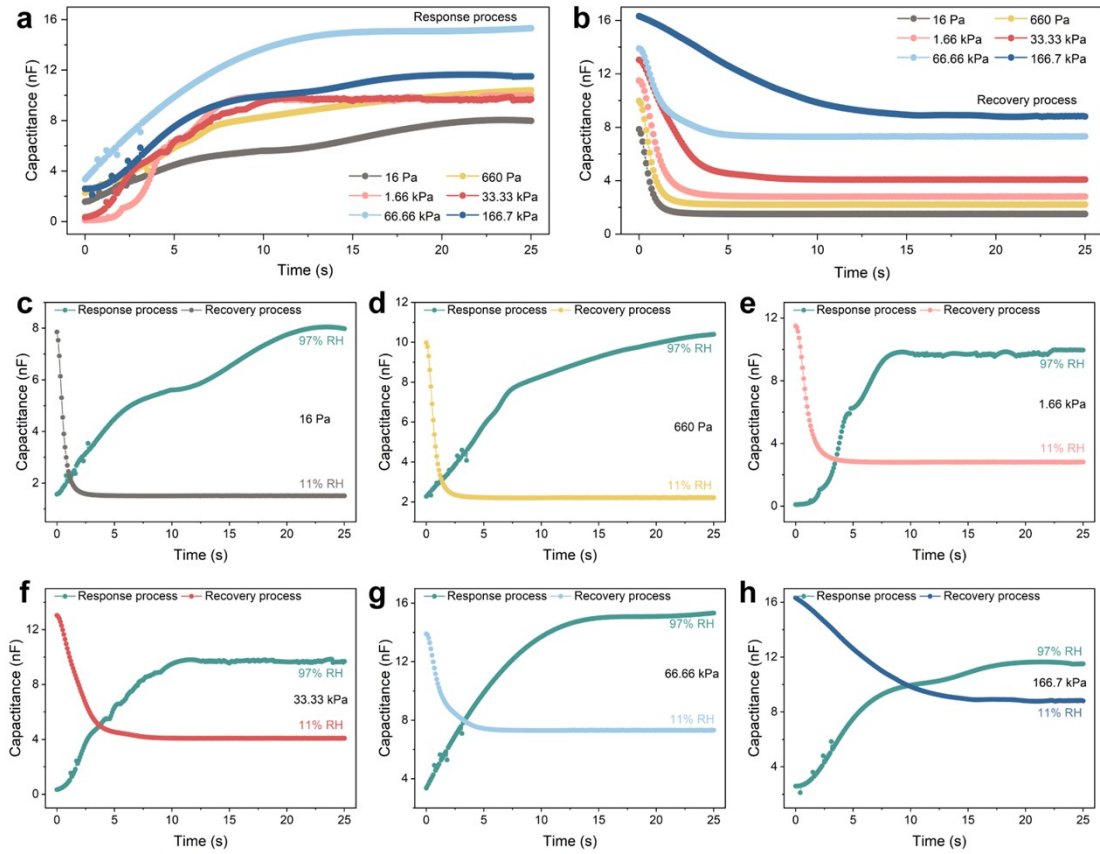

Figure S17. Capacitive response and recovery characteristics of MCC-6 to humidity changes under different pressure conditions. a) Capacitive response of the MCC-6 to humidity changes at a constant 0.016-166.7 kPa pressure. b) Recovery characteristics of the MCC-6 to humidity changes at a constant 0.016-166.7 kPa pressure. c-h) Capacitive response and recovery characteristics of the MCC-6 under various humidity at 0.016 kPa, 0.66 kPa, 1.66 kPa, 33.33 kPa, 66.66 kPa, 166.7 kPa pressure.

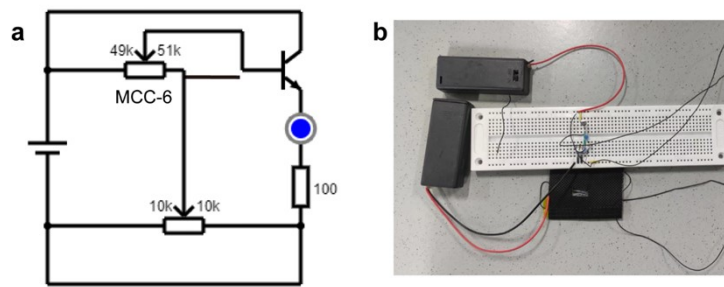

**Figure S18.** Photograph of the circuit used to monitor the condition of the lumbar spine. a) a circuit diagram consisting of a 6V electric power source, the MCC fabric sensor, an NPN-type transistor, a rotary variable resistor, a blue light-emitting diode (with a driving voltage of 1.8V). b) digital photograph of the circuit.

|           |           |           |
|-----------|-----------|-----------|
| A · - -   | J · - -   | S · · · · |
| B - · ·   | K - · -   | T -       |
| C - · · · | L · · · · | U · · -   |
| D - · ·   | M - -     | V · · · - |
| E ·       | N - ·     | W · - -   |
| F · · · · | O - - -   | X - · - - |
| G - · ·   | P · - -   | Y - · - - |
| H · · · · | Q - · - - | Z - · · · |
| I · ·     | R · - ·   |           |

**Figure S19.** Morse code cross reference table.

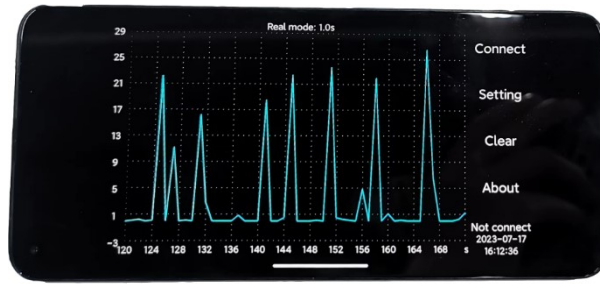

**Figure S20.** Wrist flexion current display on a smartphone.

**Table S1.** Comparison of the MCC-6 fiber with previous reports.

| Sample                 | Response/<br>Recovery<br>time(ms) | Detection limit (Pa) | Sensitivity (kPa <sup>-1</sup> )                                                                                      | Ref              |
|------------------------|-----------------------------------|----------------------|-----------------------------------------------------------------------------------------------------------------------|------------------|
| EEG/textile electrodes | 373/500                           | 160                  | <b>0.16</b> (0.169-1 kPa), <b>0.05</b> (1-10 kPa)                                                                     | 9                |
| CA/PPy (CAP) aerogel   | 112/98                            | 0.5                  | <b>1.08</b> (0-3.5 kPa), <b>0.76</b> (3.5-9 kPa) , <b>0.56</b> (9-15.5 kPa), <b>0.49</b> (15.5-20 kPa)                | 10               |
| PU/RGO sponge          | 750/750                           | 5                    | <b>17.65</b> (0.005-3.20 kPa), <b>11.51</b> (3.2-6.2 kPa), <b>2.82</b> (6.2-19.4 kPa)kPa, <b>8.61</b> (19.4-30.4 kPa) | 11               |
| graphene/SW NTs paper  | 380/60                            | 30                   | <b>12.07</b> (0.03-0.6 kPa), <b>4.3</b> (0.6-60.4 kPa)                                                                | 12               |
| MXene Spheres          | 34/56                             | 140                  | <b>3.14</b> (0.14-22.22 kPa), <b>0.22</b> (22.22-140 kPa)                                                             | 13               |
| Ag NW/PU fiber         | 18/19                             | 5                    | <b>16.7</b> (0.005-0.05 kPa), <b>0.17</b> (0.05-1 kPa)                                                                | 14               |
| MX/rGO                 | 130/140                           | 1.27                 | <b>1.24</b> (0.0012-11 kPa), <b>0.12</b> (11-100 kPa)                                                                 | 15               |
| MXene/ANFs film        | 100/160                           | 0.5                  | <b>7</b> (0.005-10 kPa), <b>10.52</b> (10-40 kPa), <b>4</b> (40-80 kPa), <b>16.73</b> (80-100 kPa)                    | 16               |
| P-rGO@WS aerogel       | 160/200                           | 180                  | <b>0.0493</b> (0.18-5 kPa), <b>0.00075</b> (5-50kPa)                                                                  | 17               |
| PAAm / PVA hydrogel    | 180/170                           | 9                    | <b>2.27</b> (0.009-0.5 kPa), <b>0.8</b> (0.5-2kPa), <b>0.021</b> (2-5kPa)                                             | 18               |
| MCC-6                  | 50/55                             | 3                    | <b>120</b> (0.33-3.33kPa), <b>6</b> (3.33-50kPa), <b>0.5</b> (50-233.33kPa)                                           | <b>This work</b> |

## References

1. Y. Du, X. Zhang, J. Wang, Z. Liu, K. Zhang, X. Ji, Y. You and X. Zhang, *ACS nano*, 2020, **14**, 11919-11928.
2. J. Huang, J. Li, X. Xu, L. Hua and Z. Lu, *ACS nano*, 2022, **16**, 8161-8171.
3. G. Li, G. Hong, D. Dong, W. Song and X. Zhang, *Advanced materials*, 2018, **30**, 1801754.
4. M. Li, Z. Wu, X. Chen, F. Gan, C. Teng, X. Li, J. Dong, X. Zhao and Q. Zhang, *Chemical Engineering Journal*, 2024, **486**, 150255.
5. Q. Li, Z. Yuan, C. Zhang, S. Hu, Z. Chen, Y. Wu, P. Chen, H. Qi and D. Ye, *Nano Letters*, 2022, **22**, 3516-3524.
6. Z. Liu, J. Lyu, Y. Ding, Y. Bao, Z. Sheng, N. Shi and X. Zhang, *ACS nano*, 2022, **16**, 15237-15248.
7. Z. Wang, H. Yang, Y. Li and X. Zheng, *ACS applied materials & interfaces*, 2020, **12**, 15726-15736.
8. M. Yang, Y. Ding, Z. Chen, Q. Wu, L. Liu, T. Liu, M. Li, K. Xu, L. Le and L. Yang, *Journal of the American Ceramic Society*, 2024.
9. N. Li, S. Gao, Y. Li, J. Liu, W. Song and G. Shen, *Nano Research*, 2023, **16**, 7583-7592.
10. S. Wang, W. Meng, H. Lv, Z. Wang and J. Pu, *Carbohydrate Polymers*, 2021, **270**, 118414.
11. W. Cao, Y. Luo, Y. Dai, X. Wang, K. Wu, H. Lin, K. Rui and J. Zhu, *ACS Appl. Mater. Interfaces*, 2023, **15**, 3131-3140.
12. Y. Wei, X. Shi, Z. Yao, J. Zhi, L. Hu, R. Yan, C. Shi, H.-D. Yu and W. Huang, *npj Flexible Electron.*, 2023, **7**, 13.
13. Z. Yang, S. Lv, Y. Zhang, J. Wang, L. Jiang, X. Jia, C. Wang, X. Yan, P. Sun, Y. Duan, F. Liu and G. Lu, *Nano-Micro Lett.*, 2022, **14**, 56.
14. Y. Dai, Y. Song, Y. Zhou, M. Zhou, H. Song, H. Wang, R. Wang, J. He, K. Qi and K. Ou, *ACS Appl. Mater. Interfaces*, 2023, **15**, 11244–11258.
15. N. Yang, H. Liu, X. Yin, F. Wang, X. Yan, X. Zhang and T. Cheng, *ACS Appl. Mater. Interfaces*, 2022, **14**, 45978-45987.
16. C.-Y. Huang, G. Yang, P. Huang, J.-M. Hu, Z.-H. Tang, Y.-Q. Li and S.-Y. Fu, *ACS Appl. Mater. Interfaces*, 2023, **15**, 3476–3485.
17. W. Huang, H. Li, L. Zheng, X. Lai, H. Guan, Y. Wei, H. Feng and X. Zeng, *Chem. Eng. J.*, 2021, **426**, 130837.
18. Y. Kim, J. B. Park, Y. J. Kwon, J.-Y. Hong, Y.-P. Jeon and J. U. Lee, *J. Mater.*

*Chem. C*, 2022, **10**, 9364-9376.
